CORRECTION

# Correction: Exploration of Novel Inhibitors for Class I Histone Deacetylase Isoforms by QSAR Modeling and Molecular Dynamics Simulation Assays

Zainab Noor, Noreen Afzal, Sajid Rashid

There are formatting errors in [Table 1](#). Please see the corrected [Table 1](#) below.

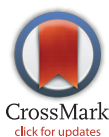

## OPEN ACCESS

**Citation:** Noor Z, Afzal N, Rashid S (2015) Correction: Exploration of Novel Inhibitors for Class I Histone Deacetylase Isoforms by QSAR Modeling and Molecular Dynamics Simulation Assays. PLoS ONE 10(11): e0143155. doi:10.1371/journal.pone.0143155

**Published:** November 12, 2015

**Copyright:** © 2015 Noor et al. This is an open access article distributed under the terms of the [Creative Commons Attribution License](#), which permits unrestricted use, distribution, and reproduction in any medium, provided the original author and source are credited.

**Table 1. Classification and biological roles of HDACs.**

| Classes   | Cofactors                     | HDACs                   | Cellular Locations                                                                           | Biological Processes                                                                                                                                                                                                                                                       | References |
|-----------|-------------------------------|-------------------------|----------------------------------------------------------------------------------------------|----------------------------------------------------------------------------------------------------------------------------------------------------------------------------------------------------------------------------------------------------------------------------|------------|
| Class I   | Zn <sup>+2</sup><br>dependent | 1, 2, 3, 8              | Nucleus, Cytoplasm, Transcriptional repressor complex, Spindle microtubule, Replication fork | Cell cycle regulation, Cell differentiation, DNA damage response, Epidermis development, Regulating cardiac myocyte proliferation on the course of cardiac development                                                                                                     | [16–18]    |
| Class II  | Zn <sup>+2</sup><br>dependent | 4, 5, 6, 7, 9, 10       | Cytoplasm, Nucleus, Neuromuscular junction, Golgi apparatus, Cytosol caveola                 | Regulation of transcription and cell differentiation, Regulation of cardiac muscle contraction, Inflammatory response, Nervous system development, Heart development, Protein polyubiquitination, Response to toxic and organic substances, Macroautophagy, Vasculogenesis | [1, 17]    |
| Class III | NAD <sup>+</sup><br>dependent | Sirtuins<br>SIRT1-SIRT7 | Nucleus, Cytoplasm                                                                           | Histone deacetylation, Regulation of phosphorylation, Regulation of double-strand break repair via homologous recombination, DNA repair mechanism                                                                                                                          | [16]       |
| Class IV  | Zn <sup>+2</sup><br>dependent | 11                      | Nucleus                                                                                      | Transcription, DNA-dependent chromatin modification, Histone Deacetylation                                                                                                                                                                                                 | [16]       |

doi:10.1371/journal.pone.0143155.t001

## Reference

1. Noor Z, Afzal N, Rashid S (2015) Exploration of Novel Inhibitors for Class I Histone Deacetylase Isoforms by QSAR Modeling and Molecular Dynamics Simulation Assays. PLoS ONE 10(10): e0139588. doi:[10.1371/journal.pone.0139588](https://doi.org/10.1371/journal.pone.0139588) PMID: [26431201](https://pubmed.ncbi.nlm.nih.gov/26431201/)
